# Supplementary material for: Tissue Specific Transcriptome Changes Upon Influenza A Virus Replication in the Duck
Source: Front Immunol. 2021 Nov 5;12:786205. doi: 10.3389/fimmu.2021.786205 (PMC8602823; doi:10.3389/fimmu.2021.786205)
Supplement: Supplementary file 5 [file DataSheet_3.xlsx]

## Sheet: VN1203 - Spleen 1 dpi
Geneid	GeneID	Chr	Strand	NExons	P.Value	FDR
ARHGAP12	ARHGAP12	NC_051773.1	-	56	2.96545e-10	2.28076e-07
BCL2	BCL2	NC_051773.1	+	8	0.000245884	0.0486288
CCDC12	CCDC12	NC_051772.1	+	14	4.95855e-05	0.0128474
CCNDBP1	CCNDBP1	NC_051792.1	+	19	1.02664e-05	0.00355318
CCNYL1	CCNYL1	NC_051778.1	+	35	0.000211441	0.0447502
CD164	CD164	NC_051774.1	+	6	1.36784e-06	0.000652976
CEP170B	CEP170B	NC_051776.1	-	19	1.92562e-06	0.000863673
CEP57	CEP57	NC_051772.1	-	20	1.82411e-05	0.00561178
CEPT1	CEPT1	NC_051798.1	+	41	1.33574e-09	8.8057e-07
CHN2	CHN2	NC_051773.1	-	10	0.000159107	0.0349631
CR1	CR1	NC_051798.1	-	87	1.58426e-11	1.46217e-08
DOP1B	DOP1B	NC_051772.1	+	20	3.50872e-11	2.85734e-08
EFR3B	EFR3B	NC_051774.1	+	8	3.70323e-06	0.00147937
EIF1B	EIF1B	NC_051773.1	-	8	3.62866e-12	5.02352e-09
ENDOV	ENDOV	NC_051790.1	+	35	1.50346e-19	3.46898e-16
EP300	EP300	NC_051772.1	-	31	4.15267e-40	2.87448e-36
FOXP1	FOXP1	NC_051784.1	+	4	4.25807e-09	2.67949e-06
GFPT1	GFPT1	NC_051794.1	-	75	1.53648e-05	0.00494676
GPR132	GPR132	NC_051776.1	+	4	1.05476e-12	1.62245e-09
HBP1	HBP1	NC_051772.1	+	22	4.91304e-05	0.0128474
HDAC9	HDAC9	NC_051773.1	-	45	2.9208e-07	0.000144413
HMGA1	HMGA1	NC_051798.1	+	16	0.000154179	0.0344268
IL10RB	IL10RB	NC_051772.1	+	14	5.19561e-10	3.5964e-07
IP6K1	IP6K1	NC_051784.1	+	51	1.82928e-08	1.01298e-05
LCMT2	LCMT2	NC_051772.1	+	27	3.74009e-06	0.00147937
LDLRAD4	LDLRAD4	NC_051773.1	+	12	0.000239269	0.0480064
LOC101789501	TRNAU1AP	NC_051795.1	-	32	8.89289e-12	9.47025e-09
LOC101793957	CHIA	NC_051798.1	+	24	4.01327e-06	0.00154332
LOC101795909	SFSWAP	NC_051787.1	-	137	1.76786e-08	1.01298e-05
LOC101796723	PTPRK	NC_051804.1	-	35	0.000213343	0.0447502
LOC101800757	CCR5-L	NC_051773.1	+	6	1.49733e-27	6.90969e-24
LOC101800880	IL9R-L	NC_051786.1	+	7	3.01873e-05	0.00835825
LOC101803225	FBXO40	NC_051772.1	-	8	1.80075e-05	0.00561178
LOC101803713	CFH	NC_051779.1	+	49	1.16714e-11	1.15413e-08
LOC110352865	LOC110352865-ncRNA	NC_051795.1	+	8	4.54852e-18	8.99568e-15
LOC113841736	NTAQ1	NC_051781.1	-	38	2.08076e-05	0.00618712
LOC113842200	NUP153-L	NW_024009751.1	+	32	2.11833e-13	3.66577e-10
LOC113843458	INTS6L	NC_051775.1	+	10	0.000137095	0.0316323
LOC113843481	CXCL13	NC_051775.1	+	4	2.10051e-05	0.00618712
LOC113844956	PPP1R3D	NC_051783.1	-	2	3.93994e-10	2.87076e-07
LOC119714000	LOC119714000~	NC_051798.1	-	7	1.00382e-05	0.00355318
LOC119714235	HSPA12A-L	NC_051772.1	+	24	1.93397e-06	0.000863673
LOC119714933	NUP153-L	NW_024009751.1	-	23	7.34227e-48	1.01646e-43
LOC119715065	IgH.914-L	NW_024009848.1	-	3	0.000218699	0.045189
LOC119715844	GIMAP2-L	NC_051773.1	-	6	0.00014804	0.0335978
LOC119718709	MHC II B-L	NC_051788.1	+	6	0.000228236	0.0464662
LRP3	LRP3	NC_051783.1	-	26	2.06667e-08	1.10042e-05
MCF2L	MCF2L	NC_051772.1	-	351	4.83991e-12	6.09125e-09
MICU1	MICU1	NC_051777.1	+	111	0.000181893	0.0393458
NCOA7	NCOA7	NC_051774.1	-	70	7.68886e-23	2.12889e-19
NHP2	NHP2	NC_051785.1	-	24	2.28992e-05	0.00660452
NPHP1	NPHP1	NC_051774.1	+	8	6.46934e-05	0.0162839
NUP54	NUP54	NC_051775.1	-	13	6.11179e-12	7.05097e-09
PALM2AKAP2	PALM2AKAP2	NC_051804.1	-	21	1.48705e-07	7.62472e-05
PSMG2	PSMG2	NC_051773.1	-	26	2.19294e-06	0.000948722
PTGFRN	PTGFRN	NC_051772.1	+	66	3.30279e-11	2.85734e-08
PTPRC	PTPRC	NC_051779.1	-	33	2.8275e-05	0.00798855
SARAF	SARAF	NC_051775.1	+	14	1.06669e-05	0.00360175
SEC31A	SEC31A	NC_051775.1	-	32	7.21542e-06	0.00262869
SERPINE2	SERPINE2	NC_051780.1	-	46	0.000136795	0.0316323
SLC35A3	SLC35A3	NC_051779.1	+	30	5.81671e-23	2.01316e-19
SLF2	SLF2	NC_051777.1	-	20	1.11975e-08	6.73994e-06
SNRNP35	SNRNP35	NC_051787.1	+	6	3.14947e-05	0.00854926
SNX11	SNX11	NC_051799.1	-	7	1.1635e-05	0.00383511
SPIN1	SPIN1	NC_051804.1	+	22	0.000119514	0.0285267
TPM4	TPM4	NC_051800.1	-	45	7.43446e-05	0.0180566
TRMT44	TRMT44	NC_051775.1	+	11	5.73951e-06	0.00214751
TTC19	TTC19	NC_051791.1	-	30	2.96597e-06	0.00124427
TYMS	TYMS	NC_051773.1	-	14	6.8611e-05	0.0169616
WDTC1	WDTC1	NC_051795.1	+	31	5.01126e-05	0.0128474

## Sheet: VN1203 - Spleen 2 dpi
Geneid	GeneID	Chr	Strand	NExons	P.Value	FDR
ALG13	ALG13	NC_051781.1	+	4	4.19359e-05	0.0148862
ANKRD37	ANKRD37	NC_051775.1	-	3	5.74909e-05	0.0185094
AP4S1	AP4S1	NC_051776.1	+	9	3.54063e-06	0.00209816
ARHGAP12	ARHGAP12	NC_051773.1	-	56	1.56344e-09	3.09204e-06
CD164	CD164	NC_051774.1	+	6	2.94457e-07	0.000291176
CR1	CR1	NC_051798.1	-	87	5.44906e-06	0.00290141
CREB1	CREB1	NC_051778.1	+	6	8.13379e-06	0.00402158
CTSB	CTSB	NC_051774.1	+	10	3.82374e-08	5.29358e-05
DONSON	DONSON	NC_051772.1	-	11	9.54006e-05	0.0253986
EFR3B	EFR3B	NC_051774.1	+	8	1.51151e-06	0.00104627
EIF1B	EIF1B	NC_051773.1	-	8	1.1303e-09	2.60798e-06
ELF1	ELF1	NC_051772.1	-	10	3.53474e-06	0.00209816
ENDOV	ENDOV	NC_051790.1	+	35	1.30268e-12	6.01145e-09
EXTL1	EXTL1	NC_051795.1	+	37	8.95228e-05	0.0243605
EXTL2	EXTL2	NC_051779.1	-	13	0.000122248	0.030771
FBXO5	FBXO5	NC_051774.1	-	9	1.40241e-06	0.00102184
GPR132	GPR132	NC_051776.1	+	4	2.47627e-07	0.000285679
HDAC9	HDAC9	NC_051773.1	-	45	2.97058e-06	0.00195832
KIAA1217	KIAA1217	NC_051773.1	+	46	0.000175301	0.0428767
LARP1B	LARP1B	NC_051775.1	-	47	7.24752e-05	0.0222966
LCMT2	LCMT2	NC_051772.1	+	27	7.84788e-07	0.000639095
LGALS8	LGALS8	NC_051774.1	+	17	3.39512e-05	0.0125871
LOC101789656	SLC9B2	NC_051775.1	+	11	3.455e-05	0.0125871
LOC101793955	SLC24A3	NC_051774.1	-	51	8.28162e-05	0.0238856
LOC101795079	RL14EP	NC_051776.1	+	24	2.81647e-09	4.87389e-06
LOC101796401	PSAP	NC_051777.1	-	44	3.42503e-05	0.0125871
LOC101800605	CD200	NC_051772.1	+	12	8.9742e-05	0.0243605
LOC101800757	CCR5-L	NC_051773.1	+	6	5.46074e-05	0.0179996
LOC101803713	CFH	NC_051779.1	+	49	1.76242e-11	6.09974e-08
LOC110352617	LOC110352617-ncRNA	NC_051785.1	-	4	6.1036e-06	0.00312957
LOC110352865	LOC110352865-ncRNA	NC_051795.1	+	8	2.79962e-07	0.000291176
LOC113839872	PGLYRP2	NC_051801.1	+	8	3.25462e-05	0.0125871
LOC113842107	CLEC4D	NC_051772.1	+	5	8.64499e-05	0.0243605
LOC113842200	NUP153-L	NW_024009751.1	+	32	1.1112e-06	0.000854638
LOC113844956	PPP1R3D	NC_051783.1	-	2	5.15809e-11	1.42817e-07
LOC119714933	NUP153-L	NW_024009751.1	-	23	2.93781e-31	4.0671e-27
LOC119716862	MADPRT-L	NC_051772.1	+	11	2.23004e-05	0.00964771
LOC119717041	CLEC4D-L	NC_051772.1	+	9	6.16248e-07	0.000533208
LOC119718229	ATAD2-L	NC_051784.1	-	3	0.000176536	0.0428767
MCF2L	MCF2L	NC_051772.1	-	351	4.32804e-07	0.000399449
MICU1	MICU1	NC_051777.1	+	111	1.30625e-05	0.00602792
NCOA7	NCOA7	NC_051774.1	-	70	3.73515e-06	0.00209816
NIFK	NIFK	NC_051778.1	-	12	4.41966e-05	0.0152964
PHF2	PHF2	NC_051784.1	-	66	0.000121384	0.030771
PIGG	PIGG	NC_051804.1	+	21	3.38363e-09	5.20478e-06
PSMB4	PSMB4	NC_051797.1	+	7	0.0001191	0.030771
PTGFRN	PTGFRN	NC_051772.1	+	66	1.11657e-12	6.01145e-09
PTPRC	PTPRC	NC_051779.1	-	33	7.47726e-05	0.0225033
PWWP2B	PWWP2B	NC_051777.1	+	4	3.11834e-05	0.0125871
RAC1	RAC1	NC_051786.1	-	18	1.81243e-05	0.00809395
RTTN	RTTN	NC_051773.1	-	13	3.22546e-05	0.0125871
SARAF	SARAF	NC_051775.1	+	14	2.17731e-07	0.000274025
SDE2	SDE2	NC_051774.1	+	7	6.30047e-05	0.0198236
SEC31A	SEC31A	NC_051775.1	-	32	3.78894e-06	0.00209816
SEPTIN11	SEPTIN11	NC_051775.1	+	56	1.20765e-05	0.00576505
TLR1-A	TLR1-A	NC_051775.1	+	7	8.0202e-05	0.0236238
UTP4	UTP4	NC_051783.1	-	16	4.98573e-05	0.0168348

## Sheet: VN1203 - Spleen 3 dpi
Geneid	GeneID	Chr	Strand	NExons	P.Value	FDR
ABRACL	ABRACL	NC_051774.1	-	6	1.50103e-05	0.00415605
ALG13	ALG13	NC_051781.1	+	4	1.66296e-06	0.000697637
ALG14	ALG14	NC_051779.1	-	9	7.59868e-06	0.00239082
ALG2	ALG2	NC_051773.1	-	2	5.79738e-05	0.0121604
ANGEL2	ANGEL2	NC_051774.1	-	32	0.000123373	0.0214489
ASB2	ASB2	NC_051776.1	+	19	1.95532e-05	0.00530773
ATF4	ATF4	NC_051772.1	-	3	6.58683e-06	0.00217115
ATP5PF	ATP5PF	NC_051772.1	-	4	5.23301e-09	4.82972e-06
BCL2	BCL2	NC_051773.1	+	8	9.90472e-06	0.00291747
BTG2	BTG2	NC_051798.1	-	2	0.000123213	0.0214489
CALCOCO2	CALCOCO2	NC_051799.1	+	26	3.23449e-05	0.00799611
CAMLG	CAMLG	NC_051785.1	+	4	5.12339e-05	0.0109907
CCDC73	CCDC73	NC_051776.1	-	5	0.000155963	0.0251064
CD164	CD164	NC_051774.1	+	6	6.86501e-13	1.18799e-09
CDK6	CDK6	NC_051773.1	+	12	0.000120843	0.0214489
CEP164	CEP164	NC_051796.1	+	22	3.53763e-10	4.08124e-07
CHCHD2	CHCHD2	NC_051791.1	+	4	1.43791e-08	1.24415e-05
CLYBL	CLYBL	NC_051772.1	-	15	0.000200056	0.0297803
CR1	CR1	NC_051798.1	-	87	1.16112e-05	0.00328051
CRELD2	CRELD2	NC_051772.1	+	19	0.000360097	0.0474779
CTSB	CTSB	NC_051774.1	+	10	2.31744e-05	0.00605334
CTSS	CTSS	NC_051797.1	+	27	6.56664e-07	0.000324673
DNAJB6	DNAJB6	NC_051773.1	-	34	0.000155576	0.0251064
DOK1	DOK1	NC_051775.1	+	7	0.000185584	0.0282332
EFR3B	EFR3B	NC_051774.1	+	8	4.88185e-11	6.75843e-08
EIF1B	EIF1B	NC_051773.1	-	8	3.55676e-14	8.20664e-11
ELF1	ELF1	NC_051772.1	-	10	8.93042e-06	0.00268767
ENDOV	ENDOV	NC_051790.1	+	35	8.41212e-08	5.1004e-05
EP300	EP300	NC_051772.1	-	31	3.87404e-07	0.000198638
EVPL	EVPL	NC_051790.1	+	5	5.11474e-05	0.0109907
GABARAPL2	GABARAPL2	NC_051783.1	+	5	1.45546e-07	8.39558e-05
GINM1	GINM1	NC_051774.1	+	8	8.52604e-06	0.00262299
GPR132	GPR132	NC_051776.1	+	4	8.45439e-08	5.1004e-05
HDAC9	HDAC9	NC_051773.1	-	45	0.000123946	0.0214489
HVCN1	HVCN1	NC_051787.1	+	17	0.000167199	0.0266058
IP6K1	IP6K1	NC_051784.1	+	51	5.74468e-06	0.00203921
KLHL7	KLHL7	NC_051773.1	-	21	0.00023601	0.0336838
LAMP1	LAMP1	NC_051772.1	-	9	2.61513e-05	0.00658253
LARP1B	LARP1B	NC_051775.1	-	47	0.000180968	0.0281496
LEKR1	LEKR1	NC_051780.1	+	18	6.26911e-10	6.67612e-07
LIX1L	LIX1L	NW_024010291.1	+	6	0.000136838	0.0228239
LOC101789501	TRNAU1AP	NC_051795.1	-	32	1.67055e-16	7.70905e-13
LOC101790617	COX6A1	NC_051787.1	+	3	0.000114918	0.0212123
LOC101793778	CHIA	NC_051798.1	+	29	1.0814e-22	7.48542e-19
LOC101793955	SLC24A3	NC_051774.1	-	51	9.35571e-05	0.0185029
LOC101794236	CLEC2B	NC_051772.1	+	7	4.57883e-08	3.72878e-05
LOC101795909	SFSWAP	NC_051787.1	-	137	0.00018486	0.0282332
LOC101799705	MRTFA	NC_051772.1	+	29	8.47365e-08	5.1004e-05
LOC101803713	CFH	NC_051779.1	+	49	4.89568e-13	9.68226e-10
LOC110351185	TLR2B	NC_051775.1	-	34	4.22712e-05	0.00959349
LOC110352617	LOC110352617-ncRNA	NC_051785.1	-	4	5.96091e-06	0.00206307
LOC113841589	RIO2-L	NW_024009829.1	+	8	0.000323028	0.0442772
LOC113842200	NUP153-L	NW_024009751.1	+	32	1.83739e-07	0.000101747
LOC113844956	PPP1R3D	NC_051783.1	-	2	7.41853e-06	0.00238842
LOC119712954	LOC119712954	NC_051798.1	+	13	5.36343e-08	4.12507e-05
LOC119714933	NUP153-L	NW_024009751.1	-	23	1.44479e-32	2.00017e-28
LOC119715074	LOC119715074-ncRNA	NW_024009848.1	-	2	6.29124e-06	0.00212429
LOC119715808	GIMAP8-L	NC_051773.1	+	7	0.000309846	0.0428951
LOC119716862	MADPRT-L	NC_051772.1	+	11	0.000100126	0.0194244
LOC119717106	LLR1-L	NC_051776.1	+	4	0.000245543	0.0346867
MCF2L	MCF2L	NC_051772.1	-	351	4.2754e-06	0.00155759
MICU1	MICU1	NC_051777.1	+	111	0.000208593	0.0307208
MRPL32	MRPL32	NC_051773.1	+	3	3.78735e-06	0.00141708
NAA50	NAA50	NC_051772.1	+	14	5.16031e-05	0.0109907
NDUFAF6	NDUFAF6	NC_051773.1	-	10	0.000173941	0.0273641
NDUFB8	NDUFB8	NC_051777.1	+	6	3.31138e-05	0.00804258
NECAP2	NECAP2	NC_051793.1	-	8	1.11996e-05	0.00323016
NUP54	NUP54	NC_051775.1	-	13	2.36353e-07	0.000125849
OSBPL1A	OSBPL1A	NC_051773.1	-	31	4.14787e-05	0.00957052
PDE4D	PDE4D	NC_051804.1	-	7	0.000331529	0.044997
PHF2	PHF2	NC_051784.1	-	66	3.45709e-06	0.00132944
PIGS	PIGS	NC_051791.1	+	10	0.000101023	0.0194244
PNRC1	PNRC1	NC_051774.1	-	2	2.5484e-05	0.00653333
POLR3G	POLR3G	NC_051804.1	+	22	0.000195968	0.0294889
PSMB4	PSMB4	NC_051797.1	+	7	7.14612e-07	0.000341141
PTGFRN	PTGFRN	NC_051772.1	+	66	2.97836e-10	3.74841e-07
PWWP2B	PWWP2B	NC_051777.1	+	4	6.83028e-16	2.36396e-12
RAC1	RAC1	NC_051786.1	-	18	0.000351808	0.0472858
RAP2C	RAP2C	NC_051781.1	-	7	0.000356969	0.0474779
RETREG2	RETREG2	NC_051778.1	+	9	1.72384e-09	1.70463e-06
REXO1	REXO1	NC_051800.1	-	59	0.000233193	0.0336283
RNF130	RNF130	NC_051785.1	-	34	0.000213226	0.0310726
RPLP1	RPLP1	NC_051773.1	-	4	7.15281e-05	0.0147796
RTTN	RTTN	NC_051773.1	-	13	2.57185e-06	0.00101728
SATB1	SATB1	NC_051773.1	+	50	3.66166e-05	0.00859188
SDE2	SDE2	NC_051774.1	+	7	1.7976e-06	0.000731942
SEMA4A	SEMA4A	NC_051797.1	+	15	1.39791e-06	0.000604772
SENP2	SENP2	NC_051780.1	+	36	0.000290016	0.0405553
SHQ1	SHQ1	NC_051784.1	+	9	0.000113732	0.0212123
SON	SON	NC_051772.1	+	31	0.000127672	0.0218209
STXBP3	STXBP3	NC_051779.1	+	37	2.08475e-05	0.00555024
SUSD3	SUSD3	NC_051784.1	-	6	0.000133437	0.0225281
SYNGR2	SYNGR2	NC_051790.1	+	4	3.47442e-05	0.00829308
TFPI2	TFPI2	NC_051773.1	+	10	2.44948e-11	3.76785e-08
TLR1-A	TLR1-A	NC_051775.1	+	7	1.52965e-14	4.2353e-11
TMEM127	TMEM127	NW_024009718.1	+	7	5.09791e-05	0.0109907
TOB2	TOB2	NC_051772.1	-	2	8.00916e-05	0.0163057
TRMT44	TRMT44	NC_051775.1	+	11	8.00195e-08	5.1004e-05
UBE2Q1	UBE2Q1	NC_051797.1	-	13	1.11483e-06	0.000514456
VCL	VCL	NC_051777.1	-	91	0.000147133	0.024249
VPS37A	VPS37A	NC_051775.1	+	13	1.28829e-06	0.000575328
VPS72	VPS72	NC_051797.1	+	7	0.000122239	0.0214489
WSB2	WSB2	NC_051787.1	+	10	6.25714e-08	4.55915e-05
YWHAE	YWHAE	NC_051791.1	-	13	0.000106426	0.020183
ZEB2	ZEB2	NC_051778.1	+	58	8.89499e-05	0.0178467

## Sheet: BC500 - Spleen 1 dpi
Geneid	GeneID	Chr	Strand	NExons	P.Value	FDR
CCDC50	CCDC50	NC_051780.1	+	21	4.22861e-05	0.0450314
ELF1	ELF1	NC_051772.1	-	10	4.40486e-06	0.0121962
ENDOV	ENDOV	NC_051790.1	+	35	1.56189e-05	0.0250557
EP400	EP400	NC_051787.1	-	50	1.62816e-05	0.0250557
KMT2A	KMT2A	NC_051796.1	-	30	1.62888e-05	0.0250557
LOC101789501	TRNAU1AP	NC_051795.1	-	32	1.59651e-16	2.21021e-12
LOC101789656	SLC9B2	NC_051775.1	+	11	1.41018e-06	0.00488064
LOC101793957	CHIA	NC_051798.1	+	24	3.84473e-05	0.0443553
LOC101799705	MRTFA	NC_051772.1	+	29	2.05277e-07	0.000947285
LOC119718710	BLB2-L	NC_051788.1	+	11	2.73054e-05	0.0347562
PTPRC	PTPRC	NC_051779.1	-	33	4.30348e-12	2.97887e-08
SH3PXD2A	SH3PXD2A	NC_051777.1	-	19	2.76162e-05	0.0347562
TMEM241	TMEM241	NC_051773.1	-	43	1.42876e-05	0.0250557
TRMT44	TRMT44	NC_051775.1	+	11	4.94738e-05	0.0489225

## Sheet: BC500 - Spleen 2 dpi
Geneid	GeneID	Chr	Strand	NExons	P.Value	FDR
ATP5PF	ATP5PF	NC_051772.1	-	4	1.81651e-05	3.73391e-15
BRCA2	BRCA2	NC_051772.1	-	25	4.83535e-11	3.78054e-09
CD164	CD164	NC_051774.1	+	6	1.98693e-11	1.18879e-08
ENDOV	ENDOV	NC_051790.1	+	35	2.57611e-12	6.87675e-08
LBR	LBR	NC_051774.1	-	14	3.04641e-05	1.33881e-07
LOC101793957	CHIA	NC_051798.1	+	24	1.61444e-05	0.00129271
LOC119714162	LOC119714162-ncRNA	NC_051799.1	-	4	5.60263e-07	0.00415934
LOC119714933	NUP153-L	NW_024009751.1	-	23	5.46162e-13	0.00554262
LOC119718715	LOC119718715	NC_051788.1	+	6	2.69713e-19	0.00933359
MRPL32	MRPL32	NC_051773.1	+	3	2.12642e-05	0.0223503
RETREG2	RETREG2	NC_051778.1	+	9	3.1444e-05	0.0228616
RMC1	RMC1	NC_051773.1	+	58	5.05945e-05	0.0245318
RUNDC1	RUNDC1	NC_051799.1	-	9	3.2029e-06	0.0310936
SDE2	SDE2	NC_051774.1	+	7	2.1031e-06	0.0310936
WSB2	WSB2	NC_051787.1	+	10	6.06778e-06	0.0466953

## Sheet: BC500 - Spleen 3 dpi
Geneid	GeneID	Chr	Strand	NExons	P.Value	FDR
ATP5PF	ATP5PF	NC_051772.1	-	4	8.05284e-07	0.00185806
BYSL	BYSL	NC_051798.1	-	8	1.78105e-05	0.0133518
CD164	CD164	NC_051774.1	+	6	4.30664e-12	2.98106e-08
CHCHD2	CHCHD2	NC_051791.1	+	4	3.55469e-06	0.00492112
ENDOV	ENDOV	NC_051790.1	+	35	1.21197e-05	0.0111857
ETS1	ETS1	NC_051796.1	-	50	2.43271e-07	0.00084196
GABARAPL2	GABARAPL2	NC_051783.1	+	5	2.85192e-05	0.0188009
INO80B	INO80B	NC_051775.1	+	5	8.47331e-06	0.00837889
LOC101789501	TRNAU1AP	NC_051795.1	-	32	6.10899e-08	0.000281909
LOC119717846	LOC119717846~	NC_051781.1	-	18	2.26479e-06	0.00391922
PIGS	PIGS	NC_051791.1	+	10	5.73563e-06	0.00721855
PLEKHO2	PLEKHO2	NC_051782.1	+	6	8.2009e-05	0.0493623
PTPRC	PTPRC	NC_051779.1	-	33	1.03273e-12	1.42971e-08
RAP2C	RAP2C	NC_051781.1	-	7	7.15954e-06	0.00762436
RETREG2	RETREG2	NC_051778.1	+	9	6.52041e-06	0.00752238
RMC1	RMC1	NC_051773.1	+	58	1.38452e-05	0.0119796
RPLP1	RPLP1	NC_051773.1	-	4	3.1322e-06	0.00481802
SEMA4A	SEMA4A	NC_051797.1	+	15	1.87636e-06	0.00371091
TFPI2	TFPI2	NC_051773.1	+	10	1.75328e-05	0.0133518
TRMT44	TRMT44	NC_051775.1	+	11	3.47501e-07	0.000962161
TTC19	TTC19	NC_051791.1	-	30	7.73263e-05	0.0486594
VPS37A	VPS37A	NC_051775.1	+	13	1.83245e-05	0.0133518
WSB2	WSB2	NC_051787.1	+	10	2.05035e-05	0.0141925

## Sheet: VN1203 - Lung 1 dpi
Geneid	Geneid	Chr	Strand	NExons	P.Value	FDR
AAK1	AAK1	NC_051794.1	-	29	0.000108004	0.00858445
ABL2	ABL2	NC_051779.1	+	6	0.000611876	0.028534
ACSS1	ACSS1	NC_051774.1	+	26	0.00130839	0.0441188
ADAMTS12	ADAMTS12	NC_051804.1	-	45	0.00139001	0.0454464
ADAMTS2	ADAMTS2	NC_051785.1	-	21	0.000670527	0.0300965
ADGRF5	ADGRF5	NC_051774.1	-	65	0.000625935	0.0286645
ADGRG6	ADGRG6	NC_051774.1	-	89	0.000831141	0.0340347
ADGRL2	ADGRL2	NC_051779.1	-	224	0.000915749	0.0361667
ADGRL4	ADGRL4	NC_051779.1	+	73	0.00109551	0.0398316
ADIPOQ	ADIPOQ	NC_051780.1	-	5	0.000123956	0.00952398
AFF4	AFF4	NC_051785.1	+	32	0.00024436	0.0155023
AGO4	AGO4	NC_051795.1	+	17	0.00086985	0.0350864
AKAP11	AKAP11	NC_051772.1	+	9	0.000623019	0.0286257
AKAP12	AKAP12	NC_051774.1	+	17	0.00108161	0.0395731
AKAP9	AKAP9	NC_051773.1	-	65	0.00023808	0.0151735
ALMS1	ALMS1	NC_051775.1	-	36	0.000356699	0.0198917
ANGPTL1	ANGPTL1	NC_051779.1	+	6	1.04114e-05	0.00163592
ANKRD11	ANKRD11	NC_051783.1	+	12	0.000174671	0.0121392
ANKRD52	ANKRD52	NW_024009682.1	+	5	0.00151637	0.0473395
AP3D1	AP3D1	NC_051800.1	-	32	0.000150139	0.0110405
APBB2	APBB2	NC_051775.1	+	33	0.000752063	0.032102
ARGLU1	ARGLU1	NC_051772.1	+	8	0.00150518	0.0470966
ARHGAP10	ARHGAP10	NC_051775.1	-	30	0.001003	0.0383995
ARHGAP32	ARHGAP32	NC_051796.1	-	4	0.00138472	0.0454464
ARHGEF4	ARHGEF4	NC_051780.1	+	21	5.05552e-09	2.79671e-06
ARID2	ARID2	NC_051772.1	+	21	0.000635548	0.0290087
ASH1L	ASH1L	NC_051797.1	-	54	0.000397364	0.0213032
ATP11A	ATP11A	NC_051772.1	-	54	0.000406515	0.0217069
ATP7A	ATP7A	NC_051781.1	-	42	0.00106744	0.0395731
ATRX	ATRX	NC_051781.1	+	168	0.00125585	0.0430978
ATXN10	ATXN10	NC_051772.1	-	26	1.06459e-05	0.00163592
BAZ1B	BAZ1B	NC_051791.1	-	18	0.00158911	0.048852
BICD2	BICD2	NC_051784.1	-	42	0.00139496	0.0455008
BICRAL	BICRAL	NC_051774.1	-	15	2.07732e-05	0.00263571
BMPR2	BMPR2	NC_051778.1	-	13	9.13645e-07	0.000233995
BRCA2	BRCA2	NC_051772.1	-	25	0.000674525	0.0300965
BRD1	BRD1	NC_051772.1	-	74	0.000709711	0.0310611
BTBD3	BTBD3	NC_051774.1	-	5	4.43458e-05	0.00447666
C27H6orf89	C27H6orf89	NC_051798.1	-	9	0.00136388	0.0451256
CABIN1	CABIN1	NC_051787.1	-	33	0.000109887	0.00863488
CALCRL	CALCRL	NC_051778.1	-	39	0.000853999	0.0346712
CASKIN2	CASKIN2	NC_051790.1	+	18	0.00119313	0.0413517
CASR	CASR	NC_051772.1	-	9	9.59188e-05	0.00789617
CCDC12	CCDC12	NC_051772.1	+	14	2.96699e-05	0.00341946
CCDC50	CCDC50	NC_051780.1	+	21	0.000220484	0.0144701
CCND1	CCND1	NC_051776.1	+	13	6.91252e-05	0.00633114
CCNDBP1	CCNDBP1	NC_051792.1	+	19	0.00114848	0.0407269
CCNT2	CCNT2	NC_051778.1	+	9	0.000604158	0.0283238
CCSER1	CCSER1	NC_051775.1	-	10	0.000260502	0.0161836
CCSER2	CCSER2	NC_051777.1	+	14	0.000920511	0.0361667
CD82	CD82	NC_051776.1	+	26	7.44999e-14	1.4719e-10
CDC42BPB	CDC42BPB	NC_051776.1	+	38	0.00066419	0.0300908
CELSR3	CELSR3	NC_051784.1	-	4	0.000108635	0.00858528
CEMIP2	CEMIP2	NC_051804.1	-	69	0.000428585	0.0226234
CEP170	CEP170	NC_051774.1	-	27	0.000287329	0.0172024
CEP89	CEP89	NC_051783.1	+	17	6.77125e-05	0.00624309
CEPT1	CEPT1	NC_051798.1	+	41	1.27052e-35	8.78562e-32
CHD9	CHD9	NC_051783.1	-	39	0.00131112	0.0441188
CLEC16A	CLEC16A	NC_051786.1	-	9	0.00110516	0.0398316
CLIC4	CLIC4	NC_051795.1	-	11	0.00122913	0.0423912
CLIP2	CLIP2	NC_051791.1	+	17	0.000205226	0.0138452
CLTC	CLTC	NC_051791.1	-	65	0.00129501	0.0439888
CMTM6	CMTM6	NC_051773.1	+	4	4.07766e-06	0.000772521
CNOT6	CNOT6	NC_051785.1	+	45	0.00057662	0.0274988
COL4A1	COL4A1	NC_051772.1	-	103	0.000103938	0.00835733
COL6A1	COL6A1	NC_051778.1	-	34	1.46201e-13	2.24662e-10
CPEB4	CPEB4	NC_051785.1	-	16	0.000322852	0.0183747
CR1	CR1	NC_051798.1	-	87	1.02339e-11	1.08873e-08
CRAMP1	CRAMP1	NC_051786.1	-	11	0.000322405	0.0183747
CRB2	CRB2	NC_051789.1	+	19	0.00124545	0.0428473
CREB3L2	CREB3L2	NC_051772.1	+	22	0.000161117	0.0114269
CREBRF	CREBRF	NC_051785.1	-	31	0.0011696	0.0411592
CRLF3	CRLF3	NC_051790.1	-	8	0.000304269	0.0176809
CSF1R	CSF1R	NC_051785.1	-	23	0.000770575	0.0326904
CTTNBP2	CTTNBP2	NC_051772.1	+	47	0.000445908	0.0232714
CX3CL1	CX3CL1	NC_051783.1	+	3	0.00146585	0.046532
CXCL12	CXCL12	NC_051777.1	-	5	3.66565e-06	0.000704109
DCHS1	DCHS1	NC_051772.1	-	28	1.09722e-10	8.9262e-08
DENND4A	DENND4A	NC_051782.1	-	39	0.00142835	0.0460723
DIAPH2	DIAPH2	NC_051781.1	-	53	0.000379436	0.0206909
DICER1	DICER1	NC_051776.1	+	26	3.16179e-06	0.000640088
DIPK2A	DIPK2A	NC_051780.1	+	5	3.23978e-06	0.000640088
DISC1	DISC1	NC_051774.1	-	14	0.000113756	0.00888838
DISP1	DISP1	NC_051774.1	+	45	0.000236715	0.0151735
DLC1	DLC1	NC_051775.1	+	54	4.87048e-07	0.000138121
DMD	DMD	NC_051772.1	-	41	0.000426634	0.0226067
DMXL1	DMXL1	NC_051804.1	-	30	0.000602358	0.0283238
DMXL2	DMXL2	NC_051782.1	-	23	0.00110595	0.0398316
DNAJB4	DNAJB4	NC_051779.1	-	15	0.00146195	0.046532
DNAJC13	DNAJC13	NC_051773.1	-	57	0.000155789	0.0111419
DOCK7	DOCK7	NC_051779.1	-	50	4.93333e-05	0.00490849
DROSHA	DROSHA	NC_051773.1	+	30	0.00128336	0.0438173
DYNC1H1	DYNC1H1	NC_051776.1	-	79	2.09886e-07	8.06313e-05
DYRK1A	DYRK1A	NC_051772.1	+	11	0.00157225	0.0486447
EDAR	EDAR	NC_051772.1	-	16	0.000928639	0.0362688
EHD4	EHD4	NC_051776.1	-	6	0.000559989	0.0270632
EIF4G3	EIF4G3	NC_051793.1	-	22	0.00100511	0.0383995
ELK4	ELK4	NC_051798.1	+	8	2.16014e-05	0.00268224
ENDOV	ENDOV	NC_051790.1	+	35	1.36527e-18	3.77633e-15
EP300	EP300	NC_051772.1	-	31	1.3196e-13	2.24662e-10
EP400	EP400	NC_051787.1	-	50	1.81959e-05	0.00243223
ERG	ERG	NC_051772.1	-	10	0.00146424	0.046532
ETNK1	ETNK1	NC_051772.1	+	8	1.42429e-06	0.000322917
FAM102A	FAM102A	NC_051789.1	+	6	0.000417062	0.0221845
FAM149A	FAM149A	NC_051775.1	-	7	1.35021e-06	0.000316499
FAM171B	FAM171B	NC_051778.1	+	5	0.000464204	0.02387
FAM214A	FAM214A	NC_051782.1	-	34	3.59871e-05	0.00391891
FAM8A1	FAM8A1	NC_051773.1	-	5	0.000362962	0.0200791
FASN	FASN	NC_051790.1	+	73	4.73937e-05	0.00474967
FAT1	FAT1	NC_051775.1	+	133	0.00048771	0.0245274
FAT2	FAT2	NC_051785.1	-	18	4.43059e-05	0.00447666
FBH1	FBH1	NC_051772.1	-	22	0.000174134	0.0121392
FBLN1	FBLN1	NC_051772.1	-	112	2.00593e-05	0.00259271
FBLN2	FBLN2	NC_051784.1	+	72	0.000500711	0.0247315
FBN1	FBN1	NC_051782.1	-	170	2.64446e-06	0.00056266
FEM1C	FEM1C	NC_051804.1	-	2	0.000315288	0.0180931
FGL2	FGL2	NC_051772.1	+	2	0.000834549	0.0340466
FLT4	FLT4	NC_051785.1	-	30	0.00021043	0.0140591
FNDC3B	FNDC3B	NC_051780.1	+	24	2.92011e-05	0.00339371
FPGS	FPGS	NC_051789.1	-	16	0.00164507	0.0498932
FRMD4A	FRMD4A	NC_051772.1	-	24	0.00107482	0.0395731
FRYL	FRYL	NC_051775.1	+	266	0.00147896	0.04666
FYCO1	FYCO1	NC_051773.1	-	21	0.00044139	0.0231228
GABPA	GABPA	NC_051772.1	+	19	2.38795e-05	0.00287177
GARRE1	GARRE1	NC_051783.1	+	39	0.00107283	0.0395731
GNA12	GNA12	NC_051786.1	-	4	1.38242e-06	0.000318648
GNA13	GNA13	NC_051790.1	-	4	0.00129772	0.0439888
GNB5	GNB5	NC_051782.1	-	23	0.00022532	0.0146299
GNG7	GNG7	NC_051800.1	+	5	2.82825e-05	0.00331481
GNS	GNS	NC_051772.1	-	14	0.000725724	0.0315622
GOLGA3	GOLGA3	NC_051787.1	-	51	0.000255146	0.0159668
GP1BA	GP1BA	NC_051800.1	-	19	0.00025423	0.0159668
GPT2	GPT2	NC_051783.1	-	11	0.00118827	0.0413517
GTF2A1	GTF2A1	NC_051776.1	+	8	0.000102416	0.00828803
GUCY1A2	GUCY1A2	NC_051772.1	+	13	0.000831794	0.0340347
HBP1	HBP1	NC_051772.1	+	22	4.42891e-07	0.000130323
HDAC8	HDAC8	NC_051781.1	-	26	0.000561615	0.0270632
HEATR1	HEATR1	NC_051774.1	-	80	0.00130871	0.0441188
HECA	HECA	NC_051774.1	-	11	0.00159772	0.0489927
HEG1	HEG1	NC_051778.1	-	72	7.41693e-08	3.53711e-05
HELB	HELB	NC_051772.1	+	12	8.77832e-05	0.00748378
HIPK1	HIPK1	NC_051798.1	+	44	1.16162e-05	0.00175738
HLF	HLF	NC_051790.1	+	8	0.000936209	0.0362688
HSPA12A	HSPA12A	NC_051777.1	-	11	0.00029637	0.0175162
HSPG2	HSPG2	NC_051793.1	-	88	1.98199e-05	0.00258593
IDH1	IDH1	NC_051778.1	+	28	0.00105365	0.0395731
IFNGR1	IFNGR1	NC_051774.1	+	7	0.000731597	0.0317178
IGF2R	IGF2R	NC_051774.1	-	48	0.00118171	0.0413517
IL10RB	IL10RB	NC_051772.1	+	13	3.59719e-07	0.000113066
IL4R	IL4R	NC_051786.1	+	20	0.00149841	0.0469908
IP6K2	IP6K2	NC_051784.1	-	6	9.11989e-08	4.20427e-05
IPMK	IPMK	NC_051777.1	-	6	0.00132134	0.0442474
IPO5	IPO5	NC_051772.1	-	27	0.00103217	0.0392167
IPO8	IPO8	NC_051772.1	+	25	0.0011014	0.0398316
IQGAP1	IQGAP1	NC_051782.1	+	112	0.00106294	0.0395731
ISM2	ISM2	NC_051776.1	+	5	0.000925425	0.0362567
ITGA1	ITGA1	NC_051804.1	+	29	2.0613e-06	0.000452504
ITGAV	ITGAV	NC_051778.1	+	29	0.001196	0.0413517
JAK2	JAK2	NC_051804.1	+	120	0.000206887	0.0138896
JMY	JMY	NC_051804.1	-	5	4.97187e-05	0.00491149
KCTD1	KCTD1	NC_051773.1	-	9	0.000431303	0.0226803
KDM4A	KDM4A	NC_051779.1	+	21	0.000821206	0.0338014
KIAA1328	KIAA1328	NC_051804.1	-	12	0.00138648	0.0454464
KIAA1549	KIAA1549	NC_051772.1	+	19	0.000792049	0.033194
KLHL24	KLHL24	NC_051780.1	-	18	2.42629e-07	8.83041e-05
KMT2A	KMT2A	NC_051796.1	-	30	0.000366985	0.0202207
L3MBTL3	L3MBTL3	NC_051774.1	-	23	1.35914e-05	0.001958
LAMA4	LAMA4	NC_051774.1	+	38	0.000740184	0.031972
LAMA5	LAMA5	NC_051792.1	+	59	0.000275652	0.0167941
LAMC1	LAMC1	NC_051779.1	+	28	0.000395493	0.0213032
LARP4	LARP4	NW_024010180.1	-	17	0.000670603	0.0300965
LCORL	LCORL	NC_051775.1	+	7	0.00111123	0.0398656
LDLRAD3	LDLRAD3	NC_051776.1	+	6	0.000137562	0.0102837
LIMA1	LIMA1	NW_024010180.1	+	11	0.00142019	0.0459983
LIMK2	LIMK2	NC_051787.1	+	72	0.0006034	0.0283238
LIMS2	LIMS2	NC_051780.1	-	20	0.000135818	0.0102643
LIN7C	LIN7C	NC_051776.1	-	5	0.0014812	0.04666
LMNB2	LMNB2	NC_051800.1	-	12	1.33302e-06	0.000316499
LOC101789501	TRNAU1AP	NC_051795.1	-	32	4.21317e-09	2.42784e-06
LOC101789531	At4g04670	NC_051778.1	-	15	4.88387e-08	2.41228e-05
LOC101790074	SETDB2	NC_051772.1	+	23	1.05291e-05	0.00163592
LOC101790579	ZNF845-L	NC_051774.1	+	2	0.000290527	0.0172603
LOC101791081	CYP7B1	NC_051773.1	+	5	0.00015327	0.0110409
LOC101791375	LOC101791375-ncRNA	NC_051776.1	+	3	1.00381e-07	4.47827e-05
LOC101791783	EC:3.6.4.12	NC_051792.1	-	32	0.000802631	0.0334349
LOC101792280	LNPEP	NC_051804.1	+	96	3.99727e-05	0.00425248
LOC101792751	FN3KRP	NC_051790.1	-	6	0.00126664	0.0433605
LOC101793263	BIRC2	NC_051772.1	-	9	0.00016842	0.0118839
LOC101793321	PCNP	NC_051772.1	+	5	0.00158954	0.048852
LOC101794851	RAD23B	NC_051804.1	-	9	0.00118576	0.0413517
LOC101795560	FIP1	NC_051781.1	-	15	0.00051332	0.0251745
LOC101795634	EC 2.7.11.1	NC_051790.1	+	54	3.58172e-06	0.00069768
LOC101796191	PCDHGA4	NC_051785.1	+	4	8.24198e-07	0.000215069
LOC101797023	ST14	NC_051772.1	+	7	0.00046946	0.02387
LOC101797281	ISY1	NC_051784.1	+	9	0.00105825	0.0395731
LOC101797326	CHMP3	NC_051775.1	-	22	3.67573e-05	0.00397151
LOC101797327	KDRL	NC_051781.1	-	60	5.473e-05	0.00522011
LOC101800286	ANKHD1	NC_051785.1	-	45	0.000871049	0.0350864
LOC101800452	DLC1	NC_051785.1	+	25	4.2578e-05	0.00442747
LOC101800605	CD200	NC_051772.1	+	12	0.000202877	0.0138216
LOC101800757	CCR5-L	NC_051773.1	+	6	2.84187e-21	1.3101e-17
LOC101800809	CREBBP	NC_051786.1	+	32	0.000682523	0.0301575
LOC101801163	CSPG4	NC_051804.1	-	7	8.72633e-05	0.00748378
LOC101802169	GYPC	NC_051778.1	-	3	8.82513e-06	0.00150681
LOC101802576	SCHIP1	NC_051780.1	+	62	1.54739e-09	1.01907e-06
LOC101803210	TRPC4AP	NC_051792.1	+	54	0.000555433	0.0269531
LOC101803225	FBXO40	NC_051772.1	-	8	3.8811e-09	2.33372e-06
LOC101803406	BRI3BP	NC_051787.1	+	3	2.54107e-05	0.00302957
LOC101804808	USP6NL	NC_051776.1	-	23	1.85079e-05	0.00243775
LOC101805444	FTL	NC_051776.1	-	3	0.000493571	0.0245584
LOC106016586	LOC106016586~	NC_051790.1	+	9	2.11487e-06	0.000457011
LOC110352865	LOC110352865-ncRNA	NC_051795.1	+	8	2.98713e-11	2.75414e-08
LOC113840904	ATAD2	NC_051781.1	+	25	0.000903117	0.0360243
LOC113840926	NTAQ1	NC_051781.1	-	38	0.00115639	0.0407983
LOC113841624	LOC113841624-ncRNA	NC_051784.1	-	2	0.00061277	0.028534
LOC113841966	NUP153-L	NW_024009945.1	+	53	0.000903864	0.0360243
LOC113842109	DIDO1	NC_051792.1	-	7	0.000137186	0.0102837
LOC113844956	PPP1R3D	NC_051783.1	-	2	1.04316e-08	5.54878e-06
LOC113845554	LOC113845554-ncRNA	NC_051790.1	+	11	0.000131781	0.0100139
LOC119713151	LOC119713151~	NC_051790.1	+	22	1.18175e-05	0.00175738
LOC119713770	SMAD4	NC_051797.1	+	32	0.000221907	0.0144763
LOC119714000	LOC119714000~	NC_051798.1	-	7	8.72824e-05	0.00748378
LOC119714235	HSPA12A-L	NC_051772.1	+	24	4.09591e-07	0.000125881
LOC119714375	NFIB-L	NC_051804.1	-	5	0.000381384	0.0206909
LOC119714933	NUP153-L	NW_024009751.1	-	23	2.27299e-13	3.14355e-10
LOC119715394	AHNAK-L	NW_024010260.1	+	9	4.99354e-07	0.000138121
LOC119715745	ATAD2-L	NC_051773.1	+	2	0.00133696	0.0446622
LOC119715795	SERPINB10-L	NC_051773.1	-	14	0.00138305	0.0454464
LOC119716123	TGFBR1	NC_051773.1	-	8	3.13723e-07	0.000103304
LOC119718713	RNF39-L	NC_051788.1	-	26	5.08155e-06	0.0009497
LONRF3	LONRF3	NC_051781.1	+	23	0.00106829	0.0395731
LOX	LOX	NC_051804.1	+	13	0.000237881	0.0151735
LPIN3	LPIN3	NC_051792.1	+	8	5.09494e-05	0.00499737
LRP3	LRP3	NC_051783.1	-	26	6.22001e-21	2.15057e-17
LRRC32	LRRC32	NC_051772.1	+	7	0.000699164	0.0306966
LTBP1	LTBP1	NC_051774.1	+	220	2.33993e-05	0.00286382
LTN1	LTN1	NC_051772.1	-	58	0.000745652	0.032026
LUZP1	LUZP1	NC_051795.1	+	6	0.00108125	0.0395731
M6PR	M6PR	NC_051772.1	+	7	0.000783839	0.0330503
MACF1	MACF1	NC_051795.1	-	82	8.01049e-07	0.000213048
MAMDC2	MAMDC2	NC_051804.1	+	20	0.000854871	0.0346712
MAN1A2	MAN1A2	NC_051772.1	+	25	0.00154943	0.0480909
MAN2A1	MAN2A1	NC_051804.1	+	22	0.000219912	0.0144701
MAP3K14	MAP3K14	NC_051799.1	-	30	0.00160121	0.0489927
MAPK8IP3	MAPK8IP3	NC_051786.1	+	32	0.000936104	0.0362688
MARCKS	MARCKS	NC_051774.1	-	5	2.99523e-05	0.00342257
MARF1	MARF1	NC_051786.1	-	94	3.42352e-05	0.00375772
MBNL1	MBNL1	NC_051780.1	+	110	0.000198573	0.0135953
MBNL2	MBNL2	NC_051772.1	-	16	2.15692e-05	0.00268224
MCF2L	MCF2L	NC_051772.1	-	351	1.20805e-11	1.19338e-08
MED26	MED26	NC_051800.1	+	8	1.23448e-05	0.00179789
MESD	MESD	NC_051782.1	+	3	0.000474311	0.0239406
MFSD11	MFSD11	NC_051790.1	-	14	0.00132076	0.0442474
MGLL	MGLL	NC_051784.1	-	15	0.000820805	0.0338014
MIA3	MIA3	NC_051774.1	+	28	3.01919e-05	0.00342257
MIB1	MIB1	NC_051773.1	+	22	0.00138896	0.0454464
MMRN2	MMRN2	NC_051777.1	-	13	0.00017875	0.0122991
MOB1B	MOB1B	NC_051775.1	-	5	4.03829e-05	0.00425674
MRPS33	MRPS33	NC_051772.1	-	5	1.41122e-05	0.00201208
MRTFB	MRTFB	NC_051786.1	+	31	1.02716e-05	0.00163592
MTMR3	MTMR3	NC_051787.1	-	31	2.38102e-05	0.00287177
MTMR6	MTMR6	NC_051772.1	+	13	0.000791817	0.033194
MTMR8	MTMR8	NC_051781.1	-	13	0.00140893	0.0457407
MTMR9	MTMR9	NC_051774.1	-	14	0.00110205	0.0398316
MYCT1	MYCT1	NC_051774.1	+	2	0.000568832	0.0272213
MYLK	MYLK	NC_051778.1	-	89	4.68326e-08	2.39887e-05
MYO6	MYO6	NC_051774.1	-	36	0.000588152	0.0279524
NAP1L1	NAP1L1	NC_051772.1	-	85	2.05436e-05	0.00263072
NAV1	NAV1	NC_051798.1	-	20	1.05546e-05	0.00163592
NCOA7	NCOA7	NC_051774.1	-	70	6.40723e-12	7.38433e-09
NDST2	NDST2	NC_051777.1	+	12	0.000770312	0.0326904
NEDD4L	NEDD4L	NC_051804.1	-	35	0.000796352	0.0332736
NFAT5	NFAT5	NC_051783.1	-	24	0.00105865	0.0395731
NFATC3	NFATC3	NC_051783.1	-	19	0.000340415	0.019138
NFIA	NFIA	NC_051779.1	+	18	0.000260951	0.0161836
NHS	NHS	NC_051772.1	-	8	0.00115254	0.0407663
NINJ1	NINJ1	NC_051784.1	+	8	0.00118732	0.0413517
NKIRAS2	NKIRAS2	NC_051799.1	-	30	3.29329e-39	4.55462e-35
NLRC5	NLRC5	NC_051783.1	+	48	0.000227107	0.014677
NOTCH1	NOTCH1	NC_051789.1	+	34	0.000676506	0.0300965
NOTCH2	NOTCH2	NC_051779.1	+	34	0.000204278	0.0138452
NPR3	NPR3	NC_051804.1	-	20	1.62472e-05	0.00222474
NR3C1	NR3C1	NC_051785.1	+	23	0.000151677	0.0110405
NUDT19	NUDT19	NC_051783.1	+	3	0.00094286	0.0364239
NUP205	NUP205	NC_051772.1	+	42	0.00112404	0.0401374
NUP54	NUP54	NC_051775.1	-	13	1.06503e-07	4.60293e-05
OXCT1	OXCT1	NC_051804.1	-	17	0.000453929	0.0235125
PALM2AKAP2	PALM2AKAP2	NC_051804.1	-	21	0.000156292	0.0111419
PANK3	PANK3	NC_051785.1	+	12	7.50247e-05	0.00669414
PAPOLG	PAPOLG	NC_051774.1	+	10	1.55657e-05	0.00215274
PARD3B	PARD3B	NC_051778.1	+	22	0.000686962	0.030257
PAXBP1	PAXBP1	NC_051772.1	-	34	0.000724365	0.0315622
PCM1	PCM1	NC_051775.1	+	40	6.97831e-06	0.00123731
PCNT	PCNT	NC_051778.1	-	44	2.57913e-05	0.00304866
PDGFD	PDGFD	NC_051772.1	+	40	0.00030209	0.0176809
PDGFRB	PDGFRB	NC_051785.1	-	69	1.66029e-05	0.00225116
PDLIM5	PDLIM5	NC_051775.1	-	24	4.608e-11	3.98304e-08
PDZD2	PDZD2	NC_051804.1	-	28	0.00143304	0.0460904
PEAK1	PEAK1	NC_051782.1	-	24	2.61962e-07	9.28957e-05
PGBD5	PGBD5	NC_051774.1	-	2	0.000742084	0.031972
PGM2L1	PGM2L1	NC_051772.1	+	13	8.08116e-06	0.00139703
PHLDB2	PHLDB2	NC_051772.1	+	51	0.000397413	0.0213032
PITPNC1	PITPNC1	NC_051790.1	+	23	0.00106772	0.0395731
PKD1	PKD1	NC_051786.1	-	9	8.55847e-10	5.91818e-07
PLEC	PLEC	NC_051773.1	+	28	0.00107643	0.0395731
PLEKHG1	PLEKHG1	NC_051774.1	+	18	0.00154377	0.0480864
PLEKHG4	PLEKHG4	NC_051783.1	-	95	0.00111266	0.0398656
PLEKHH2	PLEKHH2	NC_051774.1	-	19	5.23837e-05	0.00510188
PNPLA2	PNPLA2	NC_051776.1	+	18	0.00091063	0.0361219
POSTN	POSTN	NC_051772.1	+	248	4.33299e-05	0.00443891
PPL	PPL	NC_051786.1	-	22	0.000151244	0.0110405
PPM1F	PPM1F	NC_051787.1	+	12	0.000919132	0.0361667
PPM1K	PPM1K	NC_051775.1	+	12	6.53237e-05	0.00606327
PRICKLE1	PRICKLE1	NC_051772.1	-	8	0.000151089	0.0110405
PRKCZ	PRKCZ	NC_051793.1	+	8	0.000128007	0.00978087
PRKD3	PRKD3	NC_051774.1	+	36	0.00128632	0.0438173
PROS1	PROS1	NC_051772.1	-	81	1.43801e-05	0.00202935
PRPF8	PRPF8	NC_051791.1	+	43	0.000331438	0.0187094
PRR14L	PRR14L	NC_051787.1	-	9	0.000508722	0.0250378
PRRC2B	PRRC2B	NC_051789.1	-	22	0.000153279	0.0110409
PRUNE2	PRUNE2	NC_051804.1	-	54	0.00105388	0.0395731
PSMD10	PSMD10	NC_051781.1	+	4	4.31671e-05	0.00443891
PTK2	PTK2	NC_051773.1	+	190	8.82036e-05	0.00748378
PTPRB	PTPRB	NC_051772.1	-	65	2.75825e-07	9.53666e-05
PTPRC	PTPRC	NC_051779.1	-	33	6.31682e-06	0.00113457
PXDN	PXDN	NC_051774.1	-	21	0.000102477	0.00828803
QSER1	QSER1	NC_051776.1	+	14	0.00161735	0.0492685
RAB11FIP3	RAB11FIP3	NC_051786.1	-	16	0.00101646	0.0387264
RAB1A	RAB1A	NC_051774.1	+	12	9.03988e-05	0.00762326
RAB28	RAB28	NC_051775.1	+	11	0.000117162	0.00910312
RAB31	RAB31	NC_051773.1	-	7	3.15282e-05	0.003545
RAB3GAP2	RAB3GAP2	NC_051774.1	-	33	0.000468664	0.02387
RALGAPA1	RALGAPA1	NC_051776.1	+	46	5.27913e-05	0.00510346
RALGAPB	RALGAPB	NC_051792.1	-	30	9.37966e-05	0.00786186
RASGEF1B	RASGEF1B	NC_051775.1	-	95	4.90947e-07	0.000138121
RASSF9	RASSF9	NC_051772.1	+	9	0.00113168	0.0402341
RBBP6	RBBP6	NC_051786.1	+	18	8.36659e-05	0.00727736
RBL2	RBL2	NC_051783.1	-	22	0.000371181	0.0203708
RBM25	RBM25	NC_051776.1	-	20	0.000451128	0.0234553
RBM33	RBM33	NC_051773.1	-	51	5.41051e-07	0.00014672
REST	REST	NC_051775.1	+	6	1.69771e-07	6.90569e-05
RGMA	RGMA	NC_051782.1	-	4	0.000309737	0.0179233
RGS12	RGS12	NC_051775.1	-	22	0.000311677	0.0179604
RHOJ	RHOJ	NC_051776.1	+	5	1.82901e-05	0.00243223
RICTOR	RICTOR	NC_051804.1	-	24	0.000381503	0.0206909
RIPOR1	RIPOR1	NC_051783.1	+	154	3.5533e-07	0.000113066
RMC1	RMC1	NC_051773.1	+	58	8.07393e-06	0.00139703
RMDN2	RMDN2	NC_051774.1	-	16	2.17026e-10	1.66749e-07
RMDN3	RMDN3	NC_051776.1	-	11	7.47447e-05	0.00669414
RNF111	RNF111	NC_051782.1	+	16	0.000615088	0.0285459
RNF128	RNF128	NC_051781.1	-	14	0.00155087	0.0480909
RO60	RO60	NC_051779.1	-	4	0.000267664	0.0164524
RP2	RP2	NC_051772.1	-	5	0.000814901	0.0337428
RPL39	RPL39	NC_051781.1	-	4	0.000936222	0.0362688
RPRD2	RPRD2	NC_051797.1	-	13	0.00142914	0.0460723
RUNX1T1	RUNX1T1	NC_051773.1	+	38	0.00119384	0.0413517
SARAF	SARAF	NC_051775.1	+	14	0.00148448	0.04666
SBNO2	SBNO2	NC_051800.1	-	142	4.06283e-05	0.00425674
SCAF11	SCAF11	NC_051772.1	-	15	0.00134412	0.0447932
SEC14L1	SEC14L1	NC_051790.1	-	16	0.00160774	0.0490841
SEC16A	SEC16A	NC_051789.1	+	32	0.000304228	0.0176809
SEC24A	SEC24A	NC_051785.1	+	22	0.000881041	0.0353182
SEC31A	SEC31A	NC_051775.1	-	32	0.00049543	0.0245584
SECISBP2L	SECISBP2L	NC_051782.1	-	48	0.000359596	0.0199728
SEMA5A	SEMA5A	NC_051773.1	-	22	0.00147032	0.046532
SEPTIN11	SEPTIN11	NC_051775.1	+	56	0.000680122	0.0301477
SEPTIN8	SEPTIN8	NC_051785.1	+	36	3.23653e-05	0.00360977
SEPTIN9	SEPTIN9	NC_051790.1	+	118	4.17809e-12	5.253e-09
SETDB1	SETDB1	NC_051797.1	-	106	1.52561e-05	0.00213123
SGPP1	SGPP1	NC_051776.1	-	4	0.000271118	0.016591
SH2D3C	SH2D3C	NC_051789.1	+	24	1.93108e-06	0.000430756
SH3BP4	SH3BP4	NC_051778.1	-	8	0.000177167	0.0122511
SHPK	SHPK	NC_051791.1	-	13	0.000472453	0.0239341
SHROOM3	SHROOM3	NC_051775.1	+	15	7.0448e-05	0.00640984
SIX4	SIX4	NC_051776.1	-	3	0.00059731	0.0282904
SKI	SKI	NC_051793.1	+	15	9.81974e-06	0.00163592
SLAIN2	SLAIN2	NC_051775.1	-	8	0.000652237	0.0296725
SLC2A3	SLC2A3	NC_051772.1	-	10	0.000220766	0.0144701
SLC38A6	SLC38A6	NC_051776.1	+	13	0.00052715	0.0257615
SLC39A10	SLC39A10	NC_051778.1	+	19	1.18502e-06	0.000287524
SLC6A4	SLC6A4	NC_051791.1	+	28	0.00135134	0.0448179
SLF2	SLF2	NC_051777.1	-	20	7.14573e-15	1.64709e-11
SLIT3	SLIT3	NC_051785.1	+	177	3.06192e-07	0.000103284
SLITRK6	SLITRK6	NC_051772.1	+	2	0.000872719	0.0350864
SLK	SLK	NC_051777.1	+	36	0.000346371	0.019394
SMC4	SMC4	NC_051780.1	+	23	0.00143865	0.0461636
SMCO4	SMCO4	NC_051772.1	+	9	0.000174667	0.0121392
SMIM14	SMIM14	NC_051775.1	+	5	3.09112e-06	0.000638063
SMIM30	SMIM30	NC_051772.1	+	6	0.000285779	0.017184
SNED1	SNED1	NC_051780.1	-	32	0.000956832	0.0368607
SNX11	SNX11	NC_051799.1	-	7	4.90426e-10	3.56978e-07
SOS2	SOS2	NC_051776.1	-	23	0.000467198	0.02387
SPATA13	SPATA13	NC_051772.1	+	30	3.67218e-09	2.30847e-06
SPCS2	SPCS2	NC_051772.1	-	12	0.00158872	0.048852
SPECC1L	SPECC1L	NC_051787.1	+	10	2.33849e-07	8.74088e-05
SPEN	SPEN	NC_051793.1	-	25	0.00145168	0.046474
SPTBN1	SPTBN1	NC_051774.1	+	210	5.59511e-05	0.00530003
SQOR	SQOR	NC_051782.1	+	29	9.55922e-05	0.00789617
SRC	SRC	NC_051792.1	+	12	0.000494141	0.0245584
STX17	STX17	NC_051773.1	+	29	4.27529e-07	0.000128538
STXBP6	STXBP6	NC_051776.1	-	17	0.00081199	0.0337232
SYNE2	SYNE2	NC_051776.1	+	70	1.23499e-05	0.00179789
SYNM	SYNM	NC_051782.1	+	4	0.000213342	0.0141852
SYNPO2	SYNPO2	NC_051775.1	-	9	1.17119e-05	0.00175738
TANC2	TANC2	NC_051799.1	-	15	0.000534666	0.0260367
TBC1D14	TBC1D14	NC_051775.1	+	37	6.23107e-05	0.00582268
TBC1D22A	TBC1D22A	NC_051772.1	+	12	3.79766e-05	0.00407144
TBC1D4	TBC1D4	NC_051772.1	+	20	0.000105665	0.00844709
TERB2	TERB2	NC_051782.1	-	9	0.000748717	0.0320581
TET1	TET1	NC_051777.1	-	22	7.23888e-05	0.00654338
TGFBR3	TGFBR3	NC_051779.1	-	120	0.000911535	0.0361219
THBS2	THBS2	NC_051774.1	+	11	0.00109933	0.0398316
TIAM1	TIAM1	NC_051772.1	-	24	0.000280317	0.0169292
TJP1	TJP1	NC_051782.1	+	188	8.20775e-05	0.00718438
TLR1-A	TLR1-A	NC_051775.1	+	7	1.03567e-05	0.00163592
TMEM127	TMEM127	NW_024009718.1	+	7	0.000139302	0.0103578
TMEM129	TMEM129	NC_051775.1	+	4	5.78651e-05	0.00544404
TMEM184B	TMEM184B	NC_051772.1	+	51	2.02154e-07	7.98797e-05
TMEM230	TMEM230	NC_051794.1	-	57	5.31379e-05	0.00510346
TMTC1	TMTC1	NC_051772.1	+	19	0.000290792	0.0172603
TNFRSF19	TNFRSF19	NC_051772.1	-	36	0.00140702	0.0457407
TNRC6A	TNRC6A	NC_051786.1	+	60	0.000266727	0.0164524
TNRC6B	TNRC6B	NC_051772.1	-	117	2.72185e-06	0.000570352
TNS1	TNS1	NC_051778.1	-	32	9.97244e-06	0.00163592
TPM1	TPM1	NC_051782.1	+	134	0.00027737	0.0168247
TRADD	TRADD	NC_051783.1	-	2	0.000102171	0.00828803
TRAF2	TRAF2	NC_051789.1	-	61	0.000774368	0.0327508
TRAPPC3	TRAPPC3	NC_051795.1	-	10	1.2051e-07	5.05048e-05
TRIO	TRIO	NC_051773.1	+	68	7.68433e-05	0.00681245
TRIP11	TRIP11	NC_051776.1	+	37	9.45128e-06	0.00159404
TSPAN9	TSPAN9	NC_051772.1	+	23	7.76142e-05	0.00683697
TTC19	TTC19	NC_051791.1	-	30	0.000123577	0.00952398
TTC26	TTC26	NC_051772.1	-	4	0.00146865	0.046532
TTC28	TTC28	NC_051787.1	+	48	9.58441e-05	0.00789617
UBC	UBC	NC_051787.1	-	4	0.00104061	0.039429
UBE2W	UBE2W	NC_051773.1	+	5	0.000466417	0.02387
UBR1	UBR1	NC_051776.1	-	54	0.000665783	0.0300908
UBR4	UBR4	NC_051793.1	+	104	2.17217e-05	0.00268224
UBR5	UBR5	NC_051773.1	+	59	5.85705e-06	0.00106583
UGGT1	UGGT1	NC_051780.1	+	40	0.000676791	0.0300965
UPF1	UPF1	NC_051800.1	-	48	0.0016236	0.0493504
USP15	USP15	NC_051772.1	+	84	5.81013e-06	0.00106583
VEZF1	VEZF1	NC_051791.1	-	13	0.00134899	0.0448179
VGLL1	VGLL1	NC_051781.1	+	6	0.000622023	0.0286257
VIRMA	VIRMA	NC_051773.1	+	23	0.000617556	0.0285646
VPS13D	VPS13D	NC_051793.1	+	55	0.000567519	0.0272213
VWF	VWF	NC_051772.1	+	52	1.14985e-06	0.000283971
WWC3	WWC3	NC_051772.1	-	66	0.000303136	0.0176809
WWTR1	WWTR1	NC_051780.1	-	6	0.000325794	0.0184661
YAP1	YAP1	NC_051772.1	-	39	3.35142e-05	0.00370801
ZC2HC1A	ZC2HC1A	NC_051773.1	-	8	3.19864e-06	0.000640088
ZCCHC24	ZCCHC24	NC_051777.1	+	8	0.00024879	0.0157113
ZNF106	ZNF106	NC_051776.1	-	52	0.00112605	0.0401374
ZNF507	ZNF507	NC_051783.1	+	18	0.000987496	0.0379363
ZNF608	ZNF608	NC_051804.1	+	17	0.00049097	0.0245584
ZNF648	ZNF648	NC_051779.1	-	8	9.40517e-07	0.000236497

## Sheet: VN1203 - Lung 2 dpi
Geneid	Geneid	Chr	Strand	NExons	P.Value	FDR
ATP1B3	ATP1B3	NC_051780.1	+	22	5.57155e-05	0.0222191
CASR	CASR	NC_051772.1	-	9	5.48511e-05	0.0222191
CASS4	CASS4	NC_051792.1	-	29	2.33244e-06	0.00230656
CCSER1	CCSER1	NC_051775.1	-	10	0.000152188	0.0429543
CEPT1	CEPT1	NC_051798.1	+	41	4.63161e-12	1.2811e-08
COL6A3	COL6A3	NC_051778.1	-	47	1.40774e-06	0.00162242
DCHS1	DCHS1	NC_051772.1	-	28	4.01121e-05	0.0198125
ENDOV	ENDOV	NC_051790.1	+	35	6.19368e-13	2.14147e-09
EPB41L5	EPB41L5	NC_051778.1	+	26	2.18561e-05	0.0131422
ERCC6	ERCC6	NC_051777.1	-	33	7.84191e-05	0.0264521
FAM214A	FAM214A	NC_051782.1	-	34	3.34639e-05	0.0185123
IL10RB	IL10RB	NC_051772.1	+	13	0.000105893	0.031837
KDM7A	KDM7A	NC_051772.1	-	34	7.78627e-05	0.0264521
KMT2A	KMT2A	NC_051796.1	-	30	9.0029e-05	0.0282977
LOC101800783	MUSTN1	NC_051784.1	+	12	4.54978e-05	0.0209745
LOC101801163	CSPG4	NC_051804.1	-	7	5.7626e-05	0.0222191
LOC113841328	ZC3H11A-L	NC_051794.1	+	11	5.69153e-05	0.0222191
LOC119717041	CLEC4D-L	NC_051772.1	+	9	0.00011397	0.0335362
LOC119718715	MHC II B-L	NC_051788.1	+	6	8.72752e-06	0.00635271
LOXL3	LOXL3	NC_051775.1	-	117	5.60651e-06	0.00456106
LRP3	LRP3	NC_051783.1	-	26	2.56697e-06	0.00236675
MACF1	MACF1	NC_051795.1	-	82	6.68285e-05	0.0239685
MAP4	MAP4	NC_051773.1	-	219	5.80735e-05	0.0222191
MCF2L	MCF2L	NC_051772.1	-	351	6.08412e-16	4.20717e-12
MED26	MED26	NC_051800.1	+	8	1.26683e-05	0.00798574
MRTFB	MRTFB	NC_051786.1	+	31	3.08138e-05	0.0177564
NBEAL2	NBEAL2	NC_051773.1	-	48	5.65643e-05	0.0222191
NCOA7	NCOA7	NC_051774.1	-	70	1.37828e-06	0.00162242
NECTIN1	NECTIN1	NC_051796.1	-	11	1.10129e-05	0.00761541
NKIRAS2	NKIRAS2	NC_051799.1	-	30	2.3775e-11	5.48014e-08
PDLIM5	PDLIM5	NC_051775.1	-	24	3.89536e-15	1.79576e-11
PKD1	PKD1	NC_051786.1	-	9	9.25803e-05	0.028453
RIPOR1	RIPOR1	NC_051783.1	+	154	9.84068e-08	0.000170121
RNF128	RNF128	NC_051781.1	-	14	1.35149e-08	2.67017e-05
RUNDC1	RUNDC1	NC_051799.1	-	9	3.77312e-05	0.0193268
SEPTIN9	SEPTIN9	NC_051790.1	+	118	5.94437e-05	0.0222191
SETDB1	SETDB1	NC_051797.1	-	106	3.57206e-05	0.0190006
SLC39A10	SLC39A10	NC_051778.1	+	19	1.27033e-05	0.00798574
SLF2	SLF2	NC_051777.1	-	20	2.5094e-07	0.00034705
SRI	SRI	NC_051773.1	+	18	4.15571e-05	0.0198184
SSR1	SSR1	NC_051773.1	-	10	2.33492e-06	0.00230656
TAB2	TAB2	NC_051774.1	+	18	3.71048e-06	0.00320725
TET1	TET1	NC_051777.1	-	22	8.08867e-06	0.0062148
TMEM108	TMEM108	NC_051773.1	-	12	6.75902e-05	0.0239685
TMEM230	TMEM230	NC_051794.1	-	57	1.40773e-07	0.000216322
TPM1	TPM1	NC_051782.1	+	134	2.00878e-17	2.77814e-13
VGLL1	VGLL1	NC_051781.1	+	6	8.28085e-05	0.0267608
VWF	VWF	NC_051772.1	+	52	8.32041e-05	0.0267608
ZC2HC1A	ZC2HC1A	NC_051773.1	-	8	0.000133169	0.0383693
ZNF648	ZNF648	NC_051779.1	-	8	0.000155974	0.0431423

## Sheet: VN1203 - Lung 3 dpi
Geneid	GeneID	Chr	Strand	NExons	P.Value	FDR
ABI2	ABI2	NC_051778.1	+	8	2.78138e-05	0.00458399
ACACB	ACACB	NC_051787.1	-	8	0.000233327	0.0205744
ACOT9	ACOT9	NC_051772.1	-	39	4.36532e-05	0.0064291
ADAM23	ADAM23	NC_051778.1	+	10	0.000780506	0.0455831
AFF4	AFF4	NC_051785.1	+	32	0.000695556	0.0413274
AIDA	AIDA	NC_051774.1	-	38	4.97026e-09	3.44041e-06
ANKRD11	ANKRD11	NC_051783.1	+	12	0.000598621	0.0372077
ARHGAP32	ARHGAP32	NC_051796.1	-	4	0.00036413	0.0268139
ARHGEF4	ARHGEF4	NC_051780.1	+	21	1.46596e-11	2.25497e-08
ASH1L	ASH1L	NC_051797.1	-	54	4.08845e-05	0.00608608
ASH2L	ASH2L	NC_051794.1	-	29	0.000322535	0.0250853
ATP1B3	ATP1B3	NC_051780.1	+	22	3.43752e-08	1.76256e-05
ATRX	ATRX	NC_051781.1	+	168	0.000788091	0.0455831
ATXN10	ATXN10	NC_051772.1	-	26	7.91175e-05	0.00952437
AZI2	AZI2	NC_051773.1	+	15	0.000126936	0.0136225
BMPR2	BMPR2	NC_051778.1	-	13	0.000292447	0.0238155
CALCOCO2	CALCOCO2	NC_051799.1	+	26	5.53681e-05	0.00742137
CASR	CASR	NC_051772.1	-	9	0.000823794	0.0465494
CASS4	CASS4	NC_051792.1	-	29	5.52794e-06	0.00126815
CCDC85A	CCDC85A	NC_051774.1	+	22	1.99724e-05	0.00359089
CCNJ	CCNJ	NC_051777.1	-	4	0.000129977	0.0138415
CD82	CD82	NC_051776.1	+	26	0.000288261	0.0237541
CDC42EP1	CDC42EP1	NC_051772.1	-	11	2.62384e-05	0.00437643
CELSR3	CELSR3	NC_051784.1	-	4	0.000748791	0.0439248
CEP89	CEP89	NC_051783.1	+	17	0.000785098	0.0455831
CFAP53	CFAP53	NC_051804.1	+	13	0.000173811	0.0173111
CHD7	CHD7	NC_051773.1	-	48	0.000159814	0.016511
CHD9	CHD9	NC_051783.1	-	39	0.000611565	0.0376289
CMTM6	CMTM6	NC_051773.1	+	4	0.000554848	0.0354589
COL12A1	COL12A1	NC_051774.1	+	125	0.000125995	0.0136225
COL6A3	COL6A3	NC_051778.1	-	47	1.99047e-07	7.87315e-05
COMMD2	COMMD2	NC_051780.1	-	11	0.000137424	0.0145229
CR1	CR1	NC_051798.1	-	87	1.53588e-08	8.85949e-06
CRAMP1	CRAMP1	NC_051786.1	-	11	0.000432358	0.0300782
CX3CL1	CX3CL1	NC_051783.1	+	3	0.000906113	0.0486211
CXCL12	CXCL12	NC_051777.1	-	5	2.08753e-05	0.00366488
DAPK2	DAPK2	NC_051782.1	-	25	0.000446212	0.030581
DCHS1	DCHS1	NC_051772.1	-	28	7.8657e-13	1.81488e-09
DGKH	DGKH	NC_051772.1	+	2	0.00063919	0.0386417
DISP1	DISP1	NC_051774.1	+	45	0.000352578	0.0262424
DLC1	DLC1	NC_051775.1	+	54	4.18201e-07	0.000144739
DMXL1	DMXL1	NC_051804.1	-	30	0.000953065	0.0496024
DNAJB4	DNAJB4	NC_051779.1	-	15	0.000373597	0.0272214
DOCK7	DOCK7	NC_051779.1	-	50	1.71168e-05	0.00320223
DTYMK	DTYMK	NC_051780.1	-	14	7.39446e-06	0.00159951
DYNC1H1	DYNC1H1	NC_051776.1	-	79	6.55086e-06	0.00143953
ELF1	ELF1	NC_051772.1	-	10	0.00070934	0.0419663
ELK4	ELK4	NC_051798.1	+	8	0.000814528	0.0463606
ENDOV	ENDOV	NC_051790.1	+	35	9.3776e-08	4.32745e-05
ENTPD3	ENTPD3	NC_051773.1	+	5	0.000310651	0.0245752
EP300	EP300	NC_051772.1	-	31	1.0968e-06	0.000337423
EP400	EP400	NC_051787.1	-	50	0.000504399	0.0329382
ERGIC1	ERGIC1	NC_051785.1	-	10	0.000204064	0.0193497
EXOC6	EXOC6	NC_051777.1	-	10	0.000230732	0.020476
FAM214A	FAM214A	NC_051782.1	-	34	1.50931e-06	0.000444572
FASN	FASN	NC_051790.1	+	73	0.000887474	0.0478062
FAT1	FAT1	NC_051775.1	+	133	0.000330216	0.0253973
FAT2	FAT2	NC_051785.1	-	17	5.58945e-05	0.00742137
FBH1	FBH1	NC_051772.1	-	22	0.000927736	0.0492091
FILIP1L	FILIP1L	NC_051772.1	+	9	1.42248e-07	5.9675e-05
FLT4	FLT4	NC_051785.1	-	30	0.000188209	0.0179694
FNDC3B	FNDC3B	NC_051780.1	+	24	0.000346465	0.0259268
FRYL	FRYL	NC_051775.1	+	266	0.000208247	0.0194796
GABPA	GABPA	NC_051772.1	+	19	0.000298614	0.0240001
GNE	GNE	NC_051804.1	+	34	1.87463e-05	0.00341479
GOLGA3	GOLGA3	NC_051787.1	-	51	0.000723724	0.0426351
GPC5	GPC5	NC_051772.1	-	10	2.09134e-05	0.00366488
GPR146	GPR146	NC_051786.1	+	13	0.000118782	0.0131124
HELB	HELB	NC_051772.1	+	12	4.4121e-05	0.00642959
HIPK1	HIPK1	NC_051798.1	+	44	6.66643e-05	0.00846697
HOXB3	HOXB3	NC_051799.1	+	11	2.9928e-10	3.18711e-07
HSPA4L	HSPA4L	NC_051775.1	-	19	0.000862198	0.047149
HSPE1	HSPE1	NC_051778.1	+	8	5.11294e-05	0.00707836
HSPG2	HSPG2	NC_051793.1	-	88	0.000475615	0.0316419
IL10RB	IL10RB	NC_051772.1	+	14	9.23008e-05	0.0106484
ILRUN	ILRUN	NC_051798.1	-	23	6.3716e-06	0.00142272
ING3	ING3	NC_051772.1	-	32	2.58393e-05	0.00436242
ISM2	ISM2	NC_051776.1	+	5	4.5991e-06	0.00109776
ITGA1	ITGA1	NC_051804.1	+	29	3.34048e-05	0.00519613
ITGA8	ITGA8	NC_051773.1	-	30	0.00039958	0.0282234
ITK	ITK	NC_051785.1	+	18	0.000206649	0.0194615
ITPR3	ITPR3	NC_051798.1	+	42	0.000381632	0.0274292
JAML	JAML	NC_051796.1	-	40	0.000839057	0.0466731
JMY	JMY	NC_051804.1	-	5	5.07385e-05	0.00707836
JPH1	JPH1	NC_051773.1	+	16	0.000555806	0.0354589
KCNS3	KCNS3	NC_051774.1	+	7	8.71143e-07	0.000280467
KEL	KEL	NC_051772.1	-	22	0.000170627	0.0171291
KIAA1549	KIAA1549	NC_051772.1	+	19	0.000838128	0.0466731
KITLG	KITLG	NC_051772.1	+	10	0.000280158	0.0234367
KLC1	KLC1	NC_051776.1	-	76	0.000560537	0.0355967
KLHL24	KLHL24	NC_051780.1	-	18	0.000108025	0.0120604
KMT2A	KMT2A	NC_051796.1	-	30	0.000181898	0.0177338
LACTB	LACTB	NC_051782.1	+	6	0.000287066	0.0237541
LARP4	LARP4	NW_024010180.1	-	17	0.000849583	0.0466731
LIMA1	LIMA1	NW_024010180.1	+	11	4.77442e-05	0.00678875
LIMS2	LIMS2	NC_051780.1	-	19	0.000417187	0.0292198
LMNB2	LMNB2	NC_051800.1	-	12	0.000335527	0.0254697
LOC101789501	TRNAU1AP	NC_051795.1	-	32	1.60864e-14	7.42335e-11
LOC101789531	At4g04670	NC_051778.1	-	15	0.000170747	0.0171291
LOC101789708	SNCIAP	NC_051804.1	-	56	1.40214e-05	0.00277303
LOC101789739	NPAT	NC_051772.1	+	20	0.000648237	0.0390182
LOC101792484	IVNS1ABP	NC_051779.1	+	45	5.41614e-07	0.000182881
LOC101792826	MPRIP	NC_051786.1	+	25	3.64328e-06	0.000934028
LOC101793778	CHIA	NC_051798.1	+	29	1.1559e-07	5.00072e-05
LOC101795354	BTN1A1	NC_051788.1	-	20	0.000294242	0.0238216
LOC101796191	PCDHGA4	NC_051785.1	+	4	2.71968e-08	1.50605e-05
LOC101796401	PSAP	NC_051777.1	-	44	3.92125e-05	0.00590064
LOC101797798	CCDC51	NC_051784.1	-	13	7.29894e-05	0.00894217
LOC101800452	DLC1	NC_051785.1	+	25	1.23466e-05	0.00249284
LOC101800783	MUSTN1	NC_051784.1	+	12	1.64122e-06	0.000473357
LOC101801043	CA13	NC_051773.1	-	16	3.2106e-05	0.00505217
LOC101801163	CSPG4	NC_051804.1	-	7	5.26777e-05	0.00722049
LOC101802169	GYPC	NC_051778.1	-	3	0.00092101	0.0490402
LOC101803210	TRPC4AP	NC_051792.1	+	54	2.76193e-06	0.000721436
LOC106016306	MZT2B	NC_051782.1	+	6	0.000804801	0.0460399
LOC106016586	LOC106016586~	NC_051790.1	+	9	4.2376e-06	0.00106007
LOC106019355	CLEC2E-L	NC_051788.1	-	109	3.64365e-05	0.00554315
LOC113842109	DIDO1	NC_051792.1	-	7	5.66398e-05	0.00742137
LOC113842385	HHLA2	NC_051772.1	+	7	0.000386771	0.0274587
LOC113844150	LOC113844150-ncRNA	NC_051772.1	-	3	0.000477691	0.0316419
LOC113845051	ZC3H11A-L	NC_051784.1	+	3	0.000385036	0.0274587
LOC113845393	BTN1A1-L	NC_051788.1	-	38	8.13659e-05	0.0096276
LOC119715394	AHNAK-L	NW_024010260.1	+	9	1.64657e-05	0.00312261
LOC119715605	PCOD2	NC_051772.1	+	13	4.28807e-06	0.00106007
LOC119716123	TGFBR1	NC_051773.1	-	8	2.07431e-07	7.97688e-05
LOC119718674	CLEC2D-L	NC_051788.1	-	29	2.48581e-07	9.05619e-05
LOXL3	LOXL3	NC_051775.1	-	117	7.47341e-12	1.47803e-08
LRP3	LRP3	NC_051783.1	-	26	4.18394e-09	3.17281e-06
LRRC32	LRRC32	NC_051772.1	+	7	0.000959375	0.0497438
MACF1	MACF1	NC_051795.1	-	82	4.35447e-09	3.17281e-06
MAP4	MAP4	NC_051773.1	-	219	3.21143e-05	0.00505217
MAPK8IP3	MAPK8IP3	NC_051786.1	+	32	0.000281024	0.0234367
MARCHF2	MARCHF2	NC_051800.1	-	13	0.000301649	0.0240001
MBNL2	MBNL2	NC_051772.1	-	16	0.000100624	0.0114184
MCF2L	MCF2L	NC_051772.1	-	351	1.46414e-33	2.02696e-29
MED26	MED26	NC_051800.1	+	8	2.27132e-07	8.49844e-05
MIA3	MIA3	NC_051774.1	+	28	9.05831e-05	0.0105381
MMRN2	MMRN2	NC_051777.1	-	13	0.000217579	0.0198169
MOB1B	MOB1B	NC_051775.1	-	5	0.000919762	0.0490402
MPC1	MPC1	NC_051774.1	+	5	0.00046506	0.0311028
MRTFB	MRTFB	NC_051786.1	+	31	0.000480427	0.0316716
MTMR8	MTMR8	NC_051781.1	-	13	0.000463135	0.0311028
MTOR	MTOR	NC_051793.1	-	54	0.000215908	0.0197949
MYH11	MYH11	NC_051786.1	-	169	0.000870509	0.047149
MYLK	MYLK	NC_051778.1	-	89	1.59884e-07	6.5101e-05
NAPG	NAPG	NC_051773.1	-	11	0.000847081	0.0466731
NAV1	NAV1	NC_051798.1	-	20	0.000591733	0.0370676
NEDD4L	NEDD4L	NC_051804.1	-	35	1.97856e-11	2.73912e-08
NFE2L2	NFE2L2	NC_051778.1	-	18	7.91926e-06	0.00168668
NKIRAS2	NKIRAS2	NC_051799.1	-	30	1.5043e-05	0.00293317
NOTCH2	NOTCH2	NC_051779.1	+	34	0.000143782	0.0150797
NR3C1	NR3C1	NC_051785.1	+	23	0.000940766	0.0493565
NUP133	NUP133	NC_051774.1	-	26	0.000107762	0.0120604
OXCT1	OXCT1	NC_051804.1	-	17	0.000355234	0.0262987
PANK3	PANK3	NC_051785.1	+	12	0.000183632	0.0177777
PARP8	PARP8	NC_051804.1	+	83	0.000844763	0.0466731
PBX3	PBX3	NC_051789.1	+	18	0.000656392	0.0391685
PCM1	PCM1	NC_051775.1	+	40	3.4638e-11	4.35935e-08
PCNT	PCNT	NC_051778.1	-	44	2.44254e-05	0.00417463
PDGFRB	PDGFRB	NC_051785.1	-	69	8.31516e-05	0.00975552
PDLIM5	PDLIM5	NC_051775.1	-	24	1.79859e-18	1.24498e-14
PEAK1	PEAK1	NC_051782.1	-	24	5.43373e-05	0.00737496
PEAK3	PEAK3	NC_051800.1	-	4	2.40854e-06	0.0006538
PHF5A	PHF5A	NC_051772.1	-	9	0.000599568	0.0372077
PIK3CA	PIK3CA	NC_051780.1	+	54	4.54839e-05	0.00655916
PKD1	PKD1	NC_051786.1	-	9	2.5059e-09	2.16823e-06
PLCE1	PLCE1	NC_051777.1	-	32	2.68646e-06	0.000715218
PLEC	PLEC	NC_051773.1	+	28	0.000120289	0.0131124
PLEKHG5	PLEKHG5	NC_051793.1	-	22	4.57029e-06	0.00109776
PLEKHH2	PLEKHH2	NC_051774.1	-	19	0.000521928	0.0339229
PLN	PLN	NC_051774.1	-	3	9.83708e-05	0.0112549
PNPLA2	PNPLA2	NC_051776.1	+	18	0.000345111	0.0259268
POSTN	POSTN	NC_051772.1	+	248	0.000242072	0.0212104
PPARGC1B	PPARGC1B	NC_051785.1	-	9	8.03281e-05	0.00958675
PPL	PPL	NC_051786.1	-	22	0.000870041	0.047149
PPM1K	PPM1K	NC_051775.1	+	12	5.68236e-05	0.00742137
PRDM11	PRDM11	NC_051776.1	+	7	7.21369e-05	0.00894217
PRKAR1B	PRKAR1B	NC_051786.1	-	33	0.00021292	0.019783
PRKCZ	PRKCZ	NC_051793.1	+	8	8.94352e-06	0.00187597
PRKD3	PRKD3	NC_051774.1	+	36	0.000328007	0.0253683
PROS1	PROS1	NC_051772.1	-	81	1.46598e-06	0.000441198
PRPF8	PRPF8	NC_051791.1	+	43	6.42362e-05	0.00831108
PRRC2B	PRRC2B	NC_051789.1	-	22	0.000250463	0.0215367
PTK2	PTK2	NC_051773.1	+	190	1.21307e-11	2.09921e-08
PTPRB	PTPRB	NC_051772.1	-	65	1.22793e-05	0.00249284
RAB14	RAB14	NC_051789.1	-	17	8.31732e-09	5.48309e-06
RAB31	RAB31	NC_051773.1	-	7	0.000790229	0.0455831
RALGAPA1	RALGAPA1	NC_051776.1	+	46	0.000463167	0.0311028
RAP1GDS1	RAP1GDS1	NC_051775.1	-	93	0.000336677	0.0254697
RBL2	RBL2	NC_051783.1	-	22	0.000370964	0.0271726
RBM25	RBM25	NC_051776.1	-	20	0.000834846	0.0466731
RESF1	RESF1	NC_051772.1	-	18	0.000871867	0.047149
REST	REST	NC_051775.1	+	6	0.000219367	0.0198492
RGS12	RGS12	NC_051775.1	-	22	6.5053e-05	0.00833883
RHOJ	RHOJ	NC_051776.1	+	5	2.91867e-05	0.00469838
RHOT1	RHOT1	NC_051790.1	+	52	0.000215451	0.0197949
RIPOR1	RIPOR1	NC_051783.1	+	154	4.75931e-06	0.00111674
RMDN2	RMDN2	NC_051774.1	-	16	4.80568e-05	0.00678875
RMDN3	RMDN3	NC_051776.1	-	11	0.000314445	0.0245942
RNF128	RNF128	NC_051781.1	-	14	2.83122e-08	1.50752e-05
RNF43	RNF43	NC_051791.1	+	3	0.00045986	0.0311028
RSRP1	RSRP1	NC_051795.1	+	16	0.000313525	0.0245942
RUNDC1	RUNDC1	NC_051799.1	-	9	2.2044e-06	0.00062281
SEPSECS	SEPSECS	NC_051775.1	+	10	0.000802294	0.0460399
SEPTIN11	SEPTIN11	NC_051775.1	+	56	0.000119589	0.0131124
SESN1	SESN1	NC_051774.1	+	102	7.29039e-05	0.00894217
SETD1B	SETD1B	NC_051787.1	-	16	0.000534887	0.0346027
SFT2D3	SFT2D3	NC_051780.1	+	3	2.37508e-06	0.0006538
SIPA1L1	SIPA1L1	NC_051776.1	-	120	0.000586855	0.0369292
SKI	SKI	NC_051793.1	+	15	0.000442867	0.0305028
SLC35A3	SLC35A3	NC_051779.1	+	30	0.000247272	0.0214337
SLC35B4	SLC35B4	NC_051772.1	+	19	0.000440853	0.0305028
SLC39A10	SLC39A10	NC_051778.1	+	19	3.22835e-07	0.000114598
SLC5A3	SLC5A3	NC_051772.1	+	3	8.82677e-09	5.55444e-06
SLF2	SLF2	NC_051777.1	-	20	9.83692e-10	9.07882e-07
SLIT3	SLIT3	NC_051785.1	+	177	2.89462e-05	0.00469838
SLK	SLK	NC_051777.1	+	36	0.00026456	0.0226084
SMIM30	SMIM30	NC_051772.1	+	6	0.000181263	0.0177338
SOS2	SOS2	NC_051776.1	-	23	0.000636222	0.038631
SPECC1L	SPECC1L	NC_051787.1	+	10	2.20512e-05	0.00381596
SPG11	SPG11	NC_051782.1	+	37	1.24246e-05	0.00249284
SPRY3	SPRY3	NC_051781.1	-	6	5.18784e-08	2.53734e-05
SPTBN1	SPTBN1	NC_051774.1	+	210	6.77832e-05	0.00853083
SQOR	SQOR	NC_051782.1	+	29	0.000333443	0.0254697
SRI	SRI	NC_051773.1	+	18	3.79679e-09	3.09193e-06
SSR1	SSR1	NC_051773.1	-	10	0.000290714	0.0238145
STAB1	STAB1	NC_051784.1	-	267	0.000941211	0.0493565
STRADA	STRADA	NC_051799.1	+	46	1.59965e-05	0.00307577
SYNE2	SYNE2	NC_051776.1	+	70	0.000654048	0.0391685
SYTL2	SYTL2	NC_051772.1	-	24	9.40079e-09	5.65846e-06
TAB2	TAB2	NC_051774.1	+	18	0.000382392	0.0274292
TANC2	TANC2	NC_051799.1	-	15	7.48268e-05	0.00908686
TBC1D5	TBC1D5	NC_051773.1	+	21	0.000602031	0.0372077
TECPR1	TECPR1	NC_051786.1	-	11	1.74774e-05	0.0032261
TERB2	TERB2	NC_051782.1	-	9	0.000451619	0.0307991
TET1	TET1	NC_051777.1	-	22	3.01622e-13	8.35131e-10
TLR1-A	TLR1-A	NC_051775.1	+	7	5.19508e-10	5.13719e-07
TMEM184B	TMEM184B	NC_051772.1	+	51	0.000170326	0.0171291
TMEM97	TMEM97	NC_051791.1	-	6	0.000578562	0.0365735
TNRC6A	TNRC6A	NC_051786.1	+	60	0.000618436	0.0378833
TNRC6B	TNRC6B	NC_051772.1	-	117	5.31515e-08	2.53734e-05
TNS1	TNS1	NC_051778.1	-	32	0.000180097	0.0177338
TPCN2	TPCN2	NC_051776.1	+	15	0.000268736	0.0228245
TPM1	TPM1	NC_051782.1	+	134	4.16394e-14	1.44114e-10
TPM3	TPM3	NC_051797.1	-	160	7.61272e-07	0.00025093
TPRA1	TPRA1	NC_051784.1	-	16	1.10198e-07	4.92121e-05
TRAPPC3	TRAPPC3	NC_051795.1	-	10	5.58777e-06	0.00126815
TRIP11	TRIP11	NC_051776.1	+	37	0.000247716	0.0214337
TRNT1	TRNT1	NC_051784.1	-	13	0.000378046	0.0274014
TRPC6	TRPC6	NC_051772.1	+	22	0.000951183	0.0496024
TTC28	TTC28	NC_051787.1	+	48	0.000225227	0.020247
UBR4	UBR4	NC_051793.1	+	104	0.000417908	0.0292198
UBR5	UBR5	NC_051773.1	+	59	3.49008e-05	0.00536852
UGGT1	UGGT1	NC_051780.1	+	40	0.000161541	0.0165657
USP15	USP15	NC_051772.1	+	84	0.000817105	0.0463606
USP54	USP54	NC_051777.1	+	157	0.000185651	0.0178482
VANGL1	VANGL1	NC_051772.1	-	6	0.000485601	0.0318609
VGLL1	VGLL1	NC_051781.1	+	6	0.000226692	0.0202473
VWF	VWF	NC_051772.1	+	52	9.12576e-07	0.00028713
WWC3	WWC3	NC_051772.1	-	66	0.00083952	0.0466731
XRN1	XRN1	NC_051780.1	-	67	0.000275636	0.0232677
ZBTB18	ZBTB18	NC_051774.1	+	7	0.000631927	0.0385392
ZBTB7B	ZBTB7B	NC_051797.1	+	15	0.00093949	0.0493565
ZC2HC1A	ZC2HC1A	NC_051773.1	-	8	0.000145635	0.0151592
ZC3H7B	ZC3H7B	NC_051772.1	+	103	0.000300264	0.0240001
ZDHHC12	ZDHHC12	NC_051789.1	+	5	0.000543062	0.0349681
ZNF648	ZNF648	NC_051779.1	-	8	1.12328e-10	1.29589e-07

## Sheet: BC500 - Lung 1 dpi
Geneid	GeneID	Chr	Strand	NExons	P.Value	FDR
COL6A1	COL6A1	NC_051778.1	-	34	3.63268e-20	5.02908e-16
TPM1	TPM1	NC_051782.1	+	134	3.03003e-15	2.09738e-11
LOC101789501	TRNAU1AP	NC_051795.1	-	32	7.85095e-13	3.62295e-09
PDLIM5	PDLIM5	NC_051775.1	-	24	1.583e-11	5.47877e-08
SSR1	SSR1	NC_051773.1	-	10	4.60462e-09	1.27493e-05
LOC101795079	RL14EP	NC_051776.1	+	24	4.79199e-08	0.000110567
KMT2A	KMT2A	NC_051796.1	-	30	2.69865e-06	0.00533716

[truncated: 5 more sheets: BC500 - Lung 2 dpi, BC500 - Lung 3 dpi, BC500 - int 1dpi, BC500 - int 2 dpi, BC500 - int 3 dpi]
